# Supplementary material for: Musculoskeletal models of a human and bonobo finger: parameter identification and comparison to in vitro experiments
Source: PeerJ. 2019 Aug 9;7:e7470. doi: 10.7717/peerj.7470 (PMC6690335; doi:10.7717/peerj.7470)
Supplement: Table S1 [file peerj-07-7470-s001.xlsx]

## Sheet: B01_MC3
Specimen	Tendon path	Posture	Loading condition	Fmc_PD	Fmc_DV	Fmc_RU	Strain_R	Strain_D	Strain_U		Fmc		Total Strain
Bonobo Jasiri	Parallel to the metacarpal bone shaft	Minor flexion	FDS 200g	1.53846	-0.0182563	-0.234004	8.27714	2.7614	-36.7366		1.55626		47.7752
Bonobo Jasiri	Parallel to the metacarpal bone shaft	Minor flexion	FDP 250g	1.39626	-0.0748182	-0.181485	9.81396	4.12244	-34.5156		1.40999		48.452
Bonobo Jasiri	Parallel to the metacarpal bone shaft	Minor flexion	FDS 200g & FDP 250g	2.84547	-0.0332791	-0.375824	8.24785	3.9652	-48.0774		2.87038		60.2904
Bonobo Jasiri	Parallel to the metacarpal bone shaft	Minor flexion	FDS 300g & FDP 300g	4.32749	-0.101368	-0.454987	17.0728	11.5239	-67.3477		4.35252		95.9444
Bonobo Jasiri	Parallel to the metacarpal bone shaft	Minor flexion	FDS 800g & FDP 650g	9.61542	-0.0135172	-0.793867	5.11794	16.1955	-98.4953		9.64814		119.809
Bonobo Jasiri	Parallel to the metacarpal bone shaft	Minor flexion	FDS 800g	5.01416	0.18843	-0.467242	13.7994	6.92709	-57.1751		5.03941		77.9016
Bonobo Jasiri	Parallel to the metacarpal bone shaft	Minor flexion	FDP 650g	4.73399	-0.137539	-0.41301	7.03418	17.3655	-57.4258		4.75396		81.8255
Bonobo Jasiri	Parallel to the metacarpal bone shaft	Hyperextension	FDS 200g	1.44709	0.246348	-0.0471793	-6.41031	4.6126	-9.02426		1.46867		20.0472
Bonobo Jasiri	Parallel to the metacarpal bone shaft	Hyperextension	FDP 250g	1.11997	0.15778	-0.0372415	1.13095	2.04339	-5.96073		1.13164		9.13506
Bonobo Jasiri	Parallel to the metacarpal bone shaft	Hyperextension	FDS 200g & FDP 250g	2.71687	0.418732	-0.102361	0.270712	3.48243	-10.5219		2.75085		14.275
Bonobo Jasiri	Parallel to the metacarpal bone shaft	Hyperextension	FDS 300g & FDP 300g	3.93602	0.485111	-0.133969	-7.93899	10.1508	-6.91353		3.96806		25.0033
Bonobo Jasiri	Parallel to the metacarpal bone shaft	Hyperextension	FDS 800g	5.43871	0.657892	-0.102251	-5.53826	8.23723	-20.5565		5.47931		34.332
Bonobo Jasiri	Parallel to the metacarpal bone shaft	Hyperextension	FDP 650g	4.4141	0.361165	-0.102172	-15.4442	13.0545	-13.6769		4.43003		42.1756
Bonobo Jasiri	Parallel to the metacarpal bone shaft	Hyperextension	FDS 800g & FDP 650g	9.42669	1.10764	-0.352194	-17.8216	10.7633	-31.7725		9.49807		60.3574
Bonobo Jasiri	Parallel to the metacarpal bone shaft	Major Flexion	FDS 200g	1.55402	0.0882708	-0.266966	-6.63327	-12.146	-19.0516		1.57925		37.8309
Bonobo Jasiri	Parallel to the metacarpal bone shaft	Major Flexion	FDP 250g	1.43467	-0.0706063	-0.236279	-1.22408	3.82111	-23.1583		1.45571		28.2035
Bonobo Jasiri	Parallel to the metacarpal bone shaft	Major Flexion	FDS 200g & FDP 250g	3.0454	-0.0385326	-0.403027	8.54767	5.06135	-42.2735		3.07219		55.8825
Bonobo Jasiri	Parallel to the metacarpal bone shaft	Major Flexion	FDS 300g & FDP 300g	3.94159	-0.0445727	-0.449354	-2.64523	4.41098	-34.9085		3.96737		41.9647
Bonobo Jasiri	Parallel to the metacarpal bone shaft	Major Flexion	FDS 800g	4.9795	0.194358	-0.50654	-1.29375	1.23083	-31.2166		5.00897		33.7412
Bonobo Jasiri	Parallel to the metacarpal bone shaft	Major Flexion	FDP 650g	4.68432	-0.277609	-0.457489	-11.3482	12.1356	-41.4388		4.71479		64.9227
Bonobo Jasiri	Parallel to the metacarpal bone shaft	Major Flexion	FDS 800g & FDP 650g	9.80897	-0.157511	-0.766446	-21.4227	9.03335	-65.4383		9.84013		95.8944
Bonobo Jasiri	Parallel to the metacarpal bone shaft	Hook	FDS 200g	1.50421	0.110035	-0.0685119	2.85411	-0.83408	-10.563		1.50978		14.2512
Bonobo Jasiri	Parallel to the metacarpal bone shaft	Hook	FDP 250g	1.37456	0.0291906	-0.0666945	-5.56099	7.92683	-3.78715		1.37649		17.275
Bonobo Jasiri	Parallel to the metacarpal bone shaft	Hook	FDS 200g & FDP 250g	2.81825	0.130044	-0.160161	3.48643	11.4096	-27.5081		2.82579		42.4041
Bonobo Jasiri	Parallel to the metacarpal bone shaft	Hook	FDS 300g & FDP 300g	3.82628	0.133955	-0.194129	-0.840419	11.807	-40.9133		3.83355		53.5607
Bonobo Jasiri	Parallel to the metacarpal bone shaft	Hook	FDS 800g	4.91986	0.275422	-0.193166	2.10232	14.995	-28.4282		4.93134		45.5255
Bonobo Jasiri	Parallel to the metacarpal bone shaft	Hook	FDP 650g	4.35919	-0.0552975	-0.160616	-10.5625	16.0913	-29.4897		4.3625		56.1436
Bonobo Jasiri	Parallel to the metacarpal bone shaft	Hook	FDS 800g & FDP 650g	9.11432	0.196565	-0.408201	-8.29533	28.0787	-72.7989		9.12558		109.173
Bonobo Jasiri	Parallel to the metacarpal bone shaft	Hook	FDS 50g	0.278111	0.0323083	-0.00681656	-1.46264	-2.16614	3.17047		0.280064		6.79924
Bonobo Jasiri	Parallel to the metacarpal bone shaft	Hook	multiple load (see note below)	9.94114	0.309019	-0.239366	n/a	n/a	n/a		9.94882		n/a
Bonobo Jasiri	Parallel to the metacarpal bone shaft	Hyperextension	multiple load (see note below)	9.56432	0.750364	-0.259204	n/a	n/a	n/a		9.59721		n/a
Bonobo Jasiri	Parallel to the metacarpal bone shaft	Minor flexion	multiple load (see note below)	9.8183	0.47584	-0.554464	n/a	n/a	n/a		9.84545		n/a
Bonobo Jasiri	Parallel to the metacarpal bone shaft	Major flexion	multiple load (see note below)	9.58557	0.346292	-0.707369	n/a	n/a	n/a		9.61787		n/a
Multiple load:
FDS III	400g
FDP III	350g
ID IIIa - MCP	200g
ID IIIa - PP	100g
ID IIIb - PP	100g
ID IIIb - MCP	100g
ED III	150g
LUMB III	20g
Fmc_PD (N)	proximal (+) / distal (-) direction of the metacarpal bone
Fmc_DV (N)	dorsal (+) / volar (-) direction of the metacarpal bone
Fmc_RU (N)	radial (+) / ulnar (-) direction of the metacarpal bone
Strain_R (micro-strain)	radial-palmar side of midshaft
Strain_D (micro-strain)	dorsal side of midshaft
Strain_U (micro-strain)	ulnar-palmar side of midshaft
Fmc (N)	resultant force experienced by the third metacarpal bone
Total Strain (micro-strain)	the summation of the absolute value of each strain gauge

## Sheet: H01_MC3
Specimen	Tendon path	Posture	Loading condition	Fmc_PD	Fmc_DV	Fmc_RU	Strain_R	Strain_D	Strain_U		Fmc		Total Strain
Human #697	Parallel to the metacarpal bone shaft	Major flexion	FDS 100g & FDP 100g	1.21014	-0.148765	-0.0368279	-2.84012	25.1627	-11.163		1.21981		39.1659
Human #697	Parallel to the metacarpal bone shaft	Major flexion	FDS 200g & FDP 200g	2.77631	-0.336422	-0.0567374	-10.7362	26.2101	5.64797		2.7972		42.5943
Human #697	Parallel to the metacarpal bone shaft	Major flexion	FDS 300g & FDP 300g	4.14493	-0.509296	-0.096192	-21.228	23.6749	-1.04815		4.17721		45.951
Human #697	Parallel to the metacarpal bone shaft	Major flexion	FDS 950g & FDP 950g	12.7538	-1.81504	-0.399402	-62.6246	38.9883	-26.5424		12.8885		128.155
Human #697	Parallel to the metacarpal bone shaft	Minor flexion	FDS 100g & FDP 100g	1.16683	-0.0597387	0.0787814	-0.591191	6.3541	7.6916		1.17101		14.6369
Human #697	Parallel to the metacarpal bone shaft	Minor flexion	FDS 200g & FDP 200g	2.57117	-0.121439	0.20601	-2.1413	9.48461	11.0684		2.58226		22.6943
Human #697	Parallel to the metacarpal bone shaft	Minor flexion	FDS 300g & FDP 300g	4.52242	-0.291132	0.311756	-4.20707	12.4128	21.3398		4.54249		37.9597
Human #697	Parallel to the metacarpal bone shaft	Minor flexion	FDS 950g & FDP 950g	12.2066	-1.26483	0.610425	-42.5918	35.3797	36.3361		12.2871		114.308
Human #697	Parallel to the metacarpal bone shaft	Hyperextension	FDS 100g & FDP 100g	1.43651	0.126285	0.0184469	-0.994325	11.0961	9.60063		1.44217		21.691
Human #697	Parallel to the metacarpal bone shaft	Hyperextension	FDS 200g & FDP 200g	2.98955	0.311987	0.0604421	-4.67953	6.05645	20.3567		3.0064		31.0927
Human #697	Parallel to the metacarpal bone shaft	Hyperextension	FDS 300g & FDP 300g	4.73756	0.535987	0.0843741	-6.76858	6.05902	20.6691		4.76853		33.4967
Human #697	Parallel to the metacarpal bone shaft	Hyperextension	FDS 950g & FDP 950g	12.3665	1.46171	0.303533	-20.2331	-5.02173	17.662		12.4563		42.9168
Human #697	Parallel to the metacarpal bone shaft	Hook	FDS 100g & FDP 100g	1.16206	0.00345123	0.0613391	-1.39291	12.9668	20.6499		1.16368		35.0097
Human #697	Parallel to the metacarpal bone shaft	Hook	FDS 200g & FDP 200g	2.61166	0.00393883	0.156712	-20.7528	7.31822	10.8184		2.61636		38.8894
Human #697	Parallel to the metacarpal bone shaft	Hook	FDS 300g & FDP 300g	4.20997	0.00427411	0.212613	-19.4491	10.4956	23.005		4.21534		52.9497
Human #697	Parallel to the metacarpal bone shaft	Hook	FDS 950g & FDP 950g	11.3189	-0.281314	0.351242	-48.2931	21.5493	21.4845		11.3279		91.3269
Fmc_PD (N)	proximal (+) / distal (-) direction of the metacarpal bone
Fmc_DV (N)	dorsal (+) / volar (-) direction of the metacarpal bone
Fmc_RU (N)	radial (+) / ulnar (-) direction of the metacarpal bone
Strain_R (micro-strain)	radial-palmar side of midshaft
Strain_D (micro-strain)	dorsal side of midshaft
Strain_U (micro-strain)	ulnar-palmar side of midshaft
Fmc (N)	resultant force experienced by the third metacarpal bone
Total Strain (micro-strain)	the summation of the absolute value of each strain gauge

## Sheet: H02_MC3
Specimen	Tendon path	Posture	Loading condition	Fmc_PD	Fmc_DV	Fmc_RU	Strain_R	Strain_D	Strain_U		Fmc		Total Strain
Human #702	Parallel to the metacarpal bone shaft	Minor flexion	FDS 300g & FDP 300g	3.53819	-0.548103	0.54758	-53.2269	45.5744	71.7662		3.62202		170.567
Human #702	Parallel to the metacarpal bone shaft	Minor flexion	FDS 950g & FDP 950g	11.5255	-1.889	1.6787	-194.751	152.108	205.703		11.7993		552.561
Human #702	Parallel to the metacarpal bone shaft	Hyperextension	FDS 300g & FDP 300g	3.34997	0.130242	0.282953	-34.1347	11.6821	25.3285		3.36442		71.1453
Human #702	Parallel to the metacarpal bone shaft	Hyperextension	FDS 950g & FDP 950g	10.9442	0.232104	0.725181	-111.053	45.0416	51.1064		10.9707		207.201
Human #702	Parallel to the metacarpal bone shaft	Hook	FDS 300g & FDP 300g	3.34599	-0.278051	0.426192	-59.0128	44.6343	48.4463		3.38447		152.093
Human #702	Parallel to the metacarpal bone shaft	Hook	FDS 950g & FDP 950g	10.8238	-1.16125	0.951802	-158.458	126.484	91.5614		10.9274		376.503
Human #702	Parallel to the metacarpal bone shaft	Major flexion	FDS 300g & FDP 300g	3.63499	-0.637833	0.572648	-38.5292	38.2509	57.7629		3.73469		134.543
Human #702	Parallel to the metacarpal bone shaft	Major flexion	FDS 950g & FDP 950g	11.8357	-1.90619	1.97572	-128.69	113.643	177.397		12.15		419.73
Fmc_PD (N)	proximal (+) / distal (-) direction of the metacarpal bone
Fmc_DV (N)	dorsal (+) / volar (-) direction of the metacarpal bone
Fmc_RU (N)	radial (+) / ulnar (-) direction of the metacarpal bone
Strain_R (micro-strain)	radial-palmar side of midshaft
Strain_D (micro-strain)	dorsal side of midshaft
Strain_U (micro-strain)	ulnar-palmar side of midshaft
Fmc (N)	resultant force experienced by the third metacarpal bone
Total Strain (micro-strain)	the summation of the absolute value of each strain gauge

## Sheet: H03_MC3
Specimen	Tendon path	Posture	Loading condition	Fmc_PD	Fmc_DV	Fmc_RU	Strain_R	Strain_D	Strain_U		Fmc		Total Strain
Human #681	Parallel to the metacarpal bone shaft	Hyperextension	FDS 300g & FDP 300g	3.38832	0.212885	0.218237	-36.4256	33.7657	8.07759		3.40201		78.2688
Human #681	Parallel to the metacarpal bone shaft	Hyperextension	FDS 950g & FDP 950g	10.8795	0.762339	0.745728	-87.196	47.1561	44.8033		10.9317		179.155
Human #681	Parallel to the metacarpal bone shaft	Hook	FDS 300g & FDP 300g	3.55388	0.0202559	0.494508	-53.5519	15.7445	34.5376		3.58817		103.834
Human #681	Parallel to the metacarpal bone shaft	Hook	FDS 950g & FDP 950g	10.9603	-0.320667	1.19119	-131.236	51.8033	74.3163		11.0295		257.356
Human #681	Parallel to the metacarpal bone shaft	Major flexion	FDS 300g & FDP 300g	3.78694	-0.600331	0.529866	-15.9006	35.5614	13.2533		3.87067		64.7153
Human #681	Parallel to the metacarpal bone shaft	Major flexion	FDS 950g & FDP 950g	11.2101	-2.03274	1.75745	-77.6869	68.4518	15.5026		11.5276		161.641
Human #681	Parallel to the metacarpal bone shaft	Minor flexion	FDS 300g & FDP 300g	3.45372	-0.51309	0.470822	-32.2802	28.9642	20.9541		3.52323		82.1985
Human #681	Parallel to the metacarpal bone shaft	Minor flexion	FDS 950g & FDP 950g	10.9858	-1.89092	1.61866	-126.995	89.0083	60.8017		11.2643		276.805
Fmc_PD (N)	proximal (+) / distal (-) direction of the metacarpal bone
Fmc_DV (N)	dorsal (+) / volar (-) direction of the metacarpal bone
Fmc_RU (N)	radial (+) / ulnar (-) direction of the metacarpal bone
Strain_R (micro-strain)	radial-palmar side of midshaft
Strain_D (micro-strain)	dorsal side of midshaft
Strain_U (micro-strain)	ulnar-palmar side of midshaft
Fmc (N)	resultant force experienced by the third metacarpal bone
Total Strain (micro-strain)	the summation of the absolute value of each strain gauge

## Sheet: B01_fingertip
Specimen	Tendon path	Posture	Loading condition	Ftip_PD	Ftip_DV	Ftip_RU		Ftip
Bonobo Jasiri	Parallel to the metacarpal bone shaft	Minor flexion	FDS 250g	-0.234147	-0.20347	0.249467		0.398069
Bonobo Jasiri	Parallel to the metacarpal bone shaft	Minor flexion	FDP 200g	-0.0810354	-0.198965	0.186666		0.284601
Bonobo Jasiri	Parallel to the metacarpal bone shaft	Minor flexion	FDS 250g & FDP 200g	-0.332337	-0.514816	0.441573		0.755294
Bonobo Jasiri	Parallel to the metacarpal bone shaft	Minor flexion	FDS 300g & FDP 300g	-0.421095	-0.696051	0.496525		0.953071
Bonobo Jasiri	Parallel to the metacarpal bone shaft	Minor flexion	FDS 800g & FDP 650g	-1.1987	-1.66038	0.876682		2.22763
Bonobo Jasiri	Parallel to the metacarpal bone shaft	Minor flexion	FDS 800g	-0.848864	-0.795411	0.595914		1.30704
Bonobo Jasiri	Parallel to the metacarpal bone shaft	Minor flexion	FDP 650g	-0.32806	-0.87806	0.44261		1.03659
Bonobo Jasiri	Parallel to the metacarpal bone shaft	Minor flexion	ED 250g	0.251037	-0.242774	0.0887261		0.36032
Bonobo Jasiri	Parallel to the metacarpal bone shaft	Minor flexion	Lumb 40g	-0.0213883	-0.064848	0.0338152		0.0761984
Bonobo Jasiri	Parallel to the metacarpal bone shaft	Minor flexion	ID IIIa - PP 200g	-0.181177	0.00737762	0.244675		0.304541
Bonobo Jasiri	Parallel to the metacarpal bone shaft	Minor flexion	ID IIIa - MCP 350g	-0.0508591	-0.244824	0.424179		0.492395
Bonobo Jasiri	Parallel to the metacarpal bone shaft	Minor flexion	ID IIIb - PP 200g	-0.173965	0.074037	0.115764		0.221691
Bonobo Jasiri	Parallel to the metacarpal bone shaft	Minor flexion	ID IIIb - MCP 200g	-0.0438222	0.0342246	0.171204		0.180007
Bonobo Jasiri	Parallel to the metacarpal bone shaft	Minor flexion	multiple load (see note below)	-0.834128	-0.738713	0.84053		1.39569
Bonobo Jasiri	Parallel to the metacarpal bone shaft	Hook	FDS 250g	-0.312423	-0.268568	0.1164		0.428119
Bonobo Jasiri	Parallel to the metacarpal bone shaft	Hook	FDP 200g	-0.167085	-0.288713	0.0808824		0.343241
Bonobo Jasiri	Parallel to the metacarpal bone shaft	Hook	FDS 250g & FDP 200g	-0.495193	-0.676284	0.206065		0.863156
Bonobo Jasiri	Parallel to the metacarpal bone shaft	Hook	FDS 300g & FDP 300g	-0.612389	-0.967896	0.227937		1.16782
Bonobo Jasiri	Parallel to the metacarpal bone shaft	Hook	FDS 800g & FDP 650g	-1.56147	-2.44769	0.391112		2.92956
Bonobo Jasiri	Parallel to the metacarpal bone shaft	Hook	FDS 800g	-0.973591	-1.0855	0.245486		1.47866
Bonobo Jasiri	Parallel to the metacarpal bone shaft	Hook	FDP 650g	-0.563039	-1.29778	0.117915		1.41956
Bonobo Jasiri	Parallel to the metacarpal bone shaft	Hook	ED 250g	0.103299	-0.290387	-0.00216825		0.30822
Bonobo Jasiri	Parallel to the metacarpal bone shaft	Hook	Lumb 40g	-0.00790296	-0.0282608	0.0431876		0.052214
Bonobo Jasiri	Parallel to the metacarpal bone shaft	Hook	ID IIIa - PP 200g	-0.053483	0.0505875	0.188452		0.20232
Bonobo Jasiri	Parallel to the metacarpal bone shaft	Hook	ID IIIa - MCP 350g	-0.0762919	-0.255521	0.342427		0.434013
Bonobo Jasiri	Parallel to the metacarpal bone shaft	Hook	ID IIIb - MCP 200g	-0.0411264	-0.0175715	0.00840846		0.0455065
Bonobo Jasiri	Parallel to the metacarpal bone shaft	Hook	ID IIIb - PP 200g	-0.0703299	-0.00180826	-0.0712997		0.100166
Bonobo Jasiri	Parallel to the metacarpal bone shaft	Hook	multiple load (see note below)	-0.859147	-1.28582	0.397684		1.59675
Bonobo Jasiri	Parallel to the metacarpal bone shaft	Major flexion	FDS 250g	-0.300072	-0.0422673	0.342668		0.45744
Bonobo Jasiri	Parallel to the metacarpal bone shaft	Major flexion	FDP 200g	-0.142712	-0.102239	0.267033		0.319572
Bonobo Jasiri	Parallel to the metacarpal bone shaft	Major flexion	FDS 250g & FDP 200g	-0.507686	-0.255253	0.626013		0.845453
Bonobo Jasiri	Parallel to the metacarpal bone shaft	Major flexion	FDS 300g & FDP 300g	-0.705331	-0.255668	0.660219		0.999373
Bonobo Jasiri	Parallel to the metacarpal bone shaft	Major flexion	FDS 800g & FDP 650g	-1.87251	-0.851352	1.07296		2.31998
Bonobo Jasiri	Parallel to the metacarpal bone shaft	Major flexion	FDS 800g	-1.23704	0.0681834	0.69626		1.42116
Bonobo Jasiri	Parallel to the metacarpal bone shaft	Major flexion	FDP 650g	-0.691705	-0.407033	0.559254		0.978212
Bonobo Jasiri	Parallel to the metacarpal bone shaft	Major flexion	ED 250g	0.129628	0.234381	0.091729		0.283112
Bonobo Jasiri	Parallel to the metacarpal bone shaft	Major flexion	Lumb 40g	-0.137874	0.420639	0.0156576		0.442935
Bonobo Jasiri	Parallel to the metacarpal bone shaft	Major flexion	ID IIIa - PP 200g	-0.261149	0.436079	0.161204		0.533245
Bonobo Jasiri	Parallel to the metacarpal bone shaft	Major flexion	ID IIIa - MCP 350g	-0.197972	0.275585	0.337773		0.47878
Bonobo Jasiri	Parallel to the metacarpal bone shaft	Major flexion	ID IIIb - PP 200g	-0.269124	0.592768	0.209265		0.683809
Bonobo Jasiri	Parallel to the metacarpal bone shaft	Major flexion	ID IIIb - MCP 200g	-0.185448	0.584904	0.250954		0.662934
Bonobo Jasiri	Parallel to the metacarpal bone shaft	Major flexion	multiple load (see note below)	-1.32172	0.109116	0.853627		1.57719
Bonobo Jasiri	Parallel to the metacarpal bone shaft	Hyperextension	FDS 250g	-0.175119	-0.369119	0.0160283		0.408867
Bonobo Jasiri	Parallel to the metacarpal bone shaft	Hyperextension	FDP 200g	-0.0490208	-0.341329	-0.0126828		0.345064
Bonobo Jasiri	Parallel to the metacarpal bone shaft	Hyperextension	FDS 250g & FDP 200g	-0.198823	-0.742109	0.0141283		0.768411
Bonobo Jasiri	Parallel to the metacarpal bone shaft	Hyperextension	FDS 300g & FDP 300g	-0.214146	-0.898414	0.0231949		0.923875
Bonobo Jasiri	Parallel to the metacarpal bone shaft	Hyperextension	FDS 800g & FDP 650g	-0.428953	-2.46284	0.103507		2.50206
Bonobo Jasiri	Parallel to the metacarpal bone shaft	Hyperextension	FDS 800g	-0.447376	-1.10425	0.0277322		1.19176
Bonobo Jasiri	Parallel to the metacarpal bone shaft	Hyperextension	FDP 650g	-0.00714963	-1.09909	-0.0402168		1.09985
Bonobo Jasiri	Parallel to the metacarpal bone shaft	Hyperextension	ED 250g	0.352969	-0.296605	-0.0697344		0.466288
Bonobo Jasiri	Parallel to the metacarpal bone shaft	Hyperextension	Lumb 40g	0.0206945	0.101524	0.0235051		0.106244
Bonobo Jasiri	Parallel to the metacarpal bone shaft	Hyperextension	ID IIIa - PP 200g	0.0397543	0.0807743	0.147785		0.173047
Bonobo Jasiri	Parallel to the metacarpal bone shaft	Hyperextension	ID IIIa - MCP 350g	0.0383849	-0.0154915	0.267484		0.270668
Bonobo Jasiri	Parallel to the metacarpal bone shaft	Hyperextension	ID IIIb - PP 200g	0.179475	-0.175414	-0.164595		0.300121
Bonobo Jasiri	Parallel to the metacarpal bone shaft	Hyperextension	ID IIIb - MCP 200g	-0.00928557	0.0150479	-0.151413		0.152442
Bonobo Jasiri	Parallel to the metacarpal bone shaft	Hyperextension	multiple load (see note below)	0.0696185	-1.88464	0.132093		1.89055
Multiple load:
FDS III	400g
FDP III	350g
ID IIIa - MCP	200g
ID IIIa - PP	100g
ID IIIb - PP	100g
ID IIIb - MCP	100g
ED III	150g
LUMB III	20g
Ftip_PD (N)	proximal (+) / distal (-) direction of the distal phalanx
Ftip_DV (N)	dorsal (+) / volar (-) direction of the distal phalanx
Ftip_RU (N)	radial (+) / ulnar (-) direction of the distal phalanx
Ftip (N)	resultant fingertip force

## Sheet: H01_fingertip
Specimen	Tendon path	Posture	Loading condition	Ftip_PD	Ftip_DV	Ftip_RU		Ftip
Human #697	Parallel to the metacarpal bone shaft	Hyperextension	FDS 100g & FDP 100g	-0.126413	-0.387945	-0.02553		0.40882
Human #697	Parallel to the metacarpal bone shaft	Hyperextension	FDS 200g & FDP 200g	-0.271314	-0.864094	-0.0453943		0.906825
Human #697	Parallel to the metacarpal bone shaft	Hyperextension	FDS 300g & FDP 300g	-0.445969	-1.43032	-0.0586661		1.49938
Human #697	Parallel to the metacarpal bone shaft	Hyperextension	FDS 950g & FDP 950g	-0.951622	-4.61641	-0.0817668		4.71419
Human #697	Parallel to the metacarpal bone shaft	Hyperextension	FDS 950g	-0.730263	-2.45984	-0.0737898		2.56701
Human #697	Parallel to the metacarpal bone shaft	Hyperextension	FDP 950g	-0.16922	-2.13402	-0.0785084		2.14216
Human #697	Parallel to the metacarpal bone shaft	Hyperextension	EDC 400g	0.413395	-0.299858	-0.0623575		0.514489
Human #697	Parallel to the metacarpal bone shaft	Hyperextension	LU 45g	0.0406998	0.252857	0.0633635		0.263834
Human #697	Parallel to the metacarpal bone shaft	Hyperextension	RI_ext 325g	-0.0828172	0.574551	0.309722		0.657948
Human #697	Parallel to the metacarpal bone shaft	Hyperextension	RI_joint 325g	-0.0417687	0.429469	0.234795		0.491241
Human #697	Parallel to the metacarpal bone shaft	Hyperextension	UI_dorsal 250g	-0.0265626	0.275816	-0.22219		0.355174
Human #697	Parallel to the metacarpal bone shaft	Hyperextension	UI_volar 250g	-0.137587	0.352783	-0.217504		0.436685
Human #697	Parallel to the metacarpal bone shaft	Hook	FDS 100g & FDP 100g	-0.228418	-0.242655	-0.0081891		0.333352
Human #697	Parallel to the metacarpal bone shaft	Hook	FDS 200g & FDP 200g	-0.539652	-0.6568	0.0362029		0.850836
Human #697	Parallel to the metacarpal bone shaft	Hook	FDS 300g & FDP 300g	-0.845186	-1.04598	0.0586869		1.34605
Human #697	Parallel to the metacarpal bone shaft	Hook	FDS 950g & FDP 950g	-2.43825	-3.90492	0.196613		4.60783
Human #697	Parallel to the metacarpal bone shaft	Hook	FDS 950g	-1.44746	-1.83084	-0.0119668		2.33393
Human #697	Parallel to the metacarpal bone shaft	Hook	FDP 950g	-0.858433	-2.0098	0.0485161		2.18599
Human #697	Parallel to the metacarpal bone shaft	Hook	EDC 400g	0.303629	-0.284251	-0.00587577		0.415961
Human #697	Parallel to the metacarpal bone shaft	Hook	LU 45g	0.0642694	-0.0742467	0.0203061		0.100277
Human #697	Parallel to the metacarpal bone shaft	Hook	RI_ext 325g	0.0203438	0.170151	0.32837		0.370395
Human #697	Parallel to the metacarpal bone shaft	Hook	RI_joint 325g	-0.00276247	-0.0945157	0.249107		0.266449
Human #697	Parallel to the metacarpal bone shaft	Hook	UI_dorsal 250g	-0.0211624	0.0538032	-0.189971		0.198574
Human #697	Parallel to the metacarpal bone shaft	Hook	UI_volar 250g	-0.11483	0.148107	-0.204123		0.277106
Human #697	Parallel to the metacarpal bone shaft	Major flexion	FDS 100g & FDP 100g	-0.109759	-0.249326	0.095358		0.288624
Human #697	Parallel to the metacarpal bone shaft	Major flexion	FDS 200g & FDP 200g	-0.299837	-0.519879	0.231448		0.64323
Human #697	Parallel to the metacarpal bone shaft	Major flexion	FDS 300g & FDP 300g	-0.498315	-0.819142	0.371842		1.02839
Human #697	Parallel to the metacarpal bone shaft	Major flexion	FDS 950g & FDP 950g	-2.03004	-2.66737	0.990818		3.49537
Human #697	Parallel to the metacarpal bone shaft	Major flexion	FDS 950g	-1.3943	-1.19614	0.399333		1.87997
Human #697	Parallel to the metacarpal bone shaft	Major flexion	FDP 950g	-0.428328	-1.86327	0.380286		1.94932
Human #697	Parallel to the metacarpal bone shaft	Major flexion	EDC 400g	0.332127	-0.208473	-0.0269618		0.39306
Human #697	Parallel to the metacarpal bone shaft	Major flexion	LU 45g	-0.190101	0.0878344	-0.0105127		0.209675
Human #697	Parallel to the metacarpal bone shaft	Major flexion	RI_ext 325g	-0.476058	0.253632	0.213454		0.580106
Human #697	Parallel to the metacarpal bone shaft	Major flexion	RI_joint 325g	-0.237436	0.078029	0.229606		0.339386
Human #697	Parallel to the metacarpal bone shaft	Major flexion	UI_dorsal 250g	-0.196284	-0.000982146	-0.126867		0.233717
Human #697	Parallel to the metacarpal bone shaft	Major flexion	UI_volar 250g	-0.322344	0.06348	-0.105929		0.34519
Human #697	Parallel to the metacarpal bone shaft	Minor flexion	FDS 100g & FDP 100g	-0.166258	-0.46639	0.0632108		0.499157
Human #697	Parallel to the metacarpal bone shaft	Minor flexion	FDS 200g & FDP 200g	-0.41502	-0.888772	0.141459		0.991044
Human #697	Parallel to the metacarpal bone shaft	Minor flexion	FDS 300g & FDP 300g	-0.582093	-1.30794	0.211153		1.44711
Human #697	Parallel to the metacarpal bone shaft	Minor flexion	FDS 950g & FDP 950g	-1.85087	-3.60399	0.522876		4.08508
Human #697	Parallel to the metacarpal bone shaft	Minor flexion	FDS 950g	-1.27201	-1.71523	0.184716		2.14339
Human #697	Parallel to the metacarpal bone shaft	Minor flexion	FDP 950g	-0.522542	-2.07256	0.269292		2.15432
Human #697	Parallel to the metacarpal bone shaft	Minor flexion	EDC 400g	0.413595	-0.504885	-0.0467947		0.654339
Human #697	Parallel to the metacarpal bone shaft	Minor flexion	LU 45g	-0.0244045	-0.07151	0.0360551		0.0837211
Human #697	Parallel to the metacarpal bone shaft	Minor flexion	RI_ext 325g	-0.278863	0.126192	0.372392		0.482043
Human #697	Parallel to the metacarpal bone shaft	Minor flexion	RI_joint 325g	-0.13487	-0.0213014	0.351735		0.377308
Human #697	Parallel to the metacarpal bone shaft	Minor flexion	UI_dorsal 250g	-0.145395	-0.11935	-0.167237		0.251699
Human #697	Parallel to the metacarpal bone shaft	Minor flexion	UI_volar 250g	-0.325964	-0.00495132	-0.165798		0.365741
Ftip_PD (N)	proximal (+) / distal (-) direction of the distal phalanx
Ftip_DV (N)	dorsal (+) / volar (-) direction of the distal phalanx
Ftip_RU (N)	radial (+) / ulnar (-) direction of the distal phalanx
Ftip (N)	resultant fingertip force

## Sheet: H02_fingertip
Specimen	Tendon path	Posture	Loading condition	Ftip_PD	Ftip_DV	Ftip_RU		Ftip
Human #702	Parallel to the metacarpal bone shaft	Hook	FDS 300g & FDP 300g	-0.59389	-1.03131	-0.195492		1.20603
Human #702	Parallel to the metacarpal bone shaft	Hook	FDS 950g & FDP 950g	-1.84922	-3.9625	-0.657942		4.42198
Human #702	Parallel to the metacarpal bone shaft	Hook	FDS 950g	-1.19594	-1.84489	-0.324962		2.2225
Human #702	Parallel to the metacarpal bone shaft	Hook	FDP 950g	-0.525217	-2.16433	-0.310421		2.24868
Human #702	Parallel to the metacarpal bone shaft	Hook	EDC 400g	0.438818	-0.0260815	-0.200321		0.483084
Human #702	Parallel to the metacarpal bone shaft	Hook	LU 45g	0.0287411	-0.0255795	-0.113446		0.119793
Human #702	Parallel to the metacarpal bone shaft	Hook	RI_ext 325g	-0.111413	0.121293	0.242309		0.292982
Human #702	Parallel to the metacarpal bone shaft	Hook	RI_joint 325g	-0.271875	0.845131	-0.593767		1.06805
Human #702	Parallel to the metacarpal bone shaft	Hook	UI 500g	-0.224636	0.258569	0.107318		0.358938
Human #702	Parallel to the metacarpal bone shaft	Major flexion	FDS 300g & FDP 300g	-0.347073	-0.886136	-0.59693		1.1234
Human #702	Parallel to the metacarpal bone shaft	Major flexion	FDS 950g & FDP 950g	-1.28688	-2.9779	-1.91032		3.76474
Human #702	Parallel to the metacarpal bone shaft	Major flexion	FDS 950g	-0.967478	-1.47246	-0.778216		1.92607
Human #702	Parallel to the metacarpal bone shaft	Major flexion	FDP 950g	-0.254027	-1.44152	-1.10208		1.83224
Human #702	Parallel to the metacarpal bone shaft	Major flexion	EDC 400g	0.37106	0.196767	0.0319703		0.421219
Human #702	Parallel to the metacarpal bone shaft	Major flexion	LU 45g	-0.208422	0.152771	0.093483		0.274805
Human #702	Parallel to the metacarpal bone shaft	Major flexion	RI_ext 325g	-1.04063	0.704711	-0.0554084		1.25801
Human #702	Parallel to the metacarpal bone shaft	Major flexion	RI_joint 325g	-0.365154	0.239834	-0.04576		0.439262
Human #702	Parallel to the metacarpal bone shaft	Major flexion	UI 500g	-1.63827	0.723301	-0.331044		1.82118
Human #702	Parallel to the metacarpal bone shaft	Minor flexion	FDS 300g & FDP 300g	-0.350444	-1.04449	-0.471219		1.19826
Human #702	Parallel to the metacarpal bone shaft	Minor flexion	FDS 950g & FDP 950g	-1.49198	-3.06691	-1.4566		3.70859
Human #702	Parallel to the metacarpal bone shaft	Minor flexion	FDS 950g	-1.2327	-1.24683	-0.661211		1.87385
Human #702	Parallel to the metacarpal bone shaft	Minor flexion	FDP 950g	-0.26926	-1.90001	-0.825043		2.08884
Human #702	Parallel to the metacarpal bone shaft	Minor flexion	EDC 400g	0.476584	-0.287862	0.0134986		0.556937
Human #702	Parallel to the metacarpal bone shaft	Minor flexion	LU 45g	-0.0552254	0.0159755	0.0486236		0.0752949
Human #702	Parallel to the metacarpal bone shaft	Minor flexion	RI_ext 325g	-0.702582	0.306744	0.00901382		0.766678
Human #702	Parallel to the metacarpal bone shaft	Minor flexion	RI_joint 325g	-0.256688	0.0920627	0.0449058		0.276371
Human #702	Parallel to the metacarpal bone shaft	Minor flexion	UI 500g	-1.29214	0.692089	-0.495987		1.54745
Human #702	Parallel to the metacarpal bone shaft	Hyperextansion	FDS 300g & FDP 300g	-0.33399	-1.34342	-0.271125		1.41061
Human #702	Parallel to the metacarpal bone shaft	Hyperextansion	FDS 950g & FDP 950g	-0.856106	-4.53206	-0.676972		4.66162
Human #702	Parallel to the metacarpal bone shaft	Hyperextansion	FDS 950g	-0.749168	-1.76104	-0.263212		1.93179
Human #702	Parallel to the metacarpal bone shaft	Hyperextansion	FDP 950g	-0.0860134	-2.46249	-0.328557		2.4858
Human #702	Parallel to the metacarpal bone shaft	Hyperextansion	EDC 400g	0.460699	-0.635133	-0.0259165		0.785054
Human #702	Parallel to the metacarpal bone shaft	Hyperextansion	LU 45g	0.0479803	-0.0356554	0.0620618		0.086169
Human #702	Parallel to the metacarpal bone shaft	Hyperextansion	RI_ext 325g	0.0439206	-0.411917	0.34206		0.537224
Human #702	Parallel to the metacarpal bone shaft	Hyperextansion	RI_joint 325g	-0.18896	-0.0524755	0.214337		0.290517
Human #702	Parallel to the metacarpal bone shaft	Hyperextansion	UI 500g	-0.24194	0.487078	-0.564413		0.7838
Ftip_PD (N)	proximal (+) / distal (-) direction of the distal phalanx
Ftip_DV (N)	dorsal (+) / volar (-) direction of the distal phalanx
Ftip_RU (N)	radial (+) / ulnar (-) direction of the distal phalanx
Ftip (N)	resultant fingertip force

## Sheet: H03_fingertip
Specimen	Tendon path	Posture	Loading condition	Ftip_PD	Ftip_DV	Ftip_RU		Ftip
Human #681	Parallel to the metacarpal bone shaft	Major flexion	FDS 300g & FDP 300g	-0.320508	-0.744362	-0.439654		0.922006
Human #681	Parallel to the metacarpal bone shaft	Major flexion	FDS 950g & FDP 950g	-1.25993	-2.94735	-1.76723		3.66025
Human #681	Parallel to the metacarpal bone shaft	Major flexion	FDS 950g	-1.09727	-1.15021	-0.711511		1.74162
Human #681	Parallel to the metacarpal bone shaft	Major flexion	FDP 950g	-0.289555	-1.91979	-0.704333		2.06531
Human #681	Parallel to the metacarpal bone shaft	Major flexion	EDC 400g	0.313592	0.124867	0.125442		0.360093
Human #681	Parallel to the metacarpal bone shaft	Major flexion	LU 45g	-0.149555	0.150773	0.155774		0.263372
Human #681	Parallel to the metacarpal bone shaft	Major flexion	RI_ext 325g	-0.404106	0.210072	-0.11267		0.469176
Human #681	Parallel to the metacarpal bone shaft	Major flexion	RI_joint 325g	-0.20536	0.139462	0.0525917		0.253748
Human #681	Parallel to the metacarpal bone shaft	Major flexion	UI 500g	-1.07113	0.432414	-0.360813		1.21016
Human #681	Parallel to the metacarpal bone shaft	Minor flexion	FDS 300g & FDP 300g	-0.533176	-1.06477	-0.474313		1.28179
Human #681	Parallel to the metacarpal bone shaft	Minor flexion	FDS 950g & FDP 950g	-1.65274	-3.1552	-1.57807		3.89579
Human #681	Parallel to the metacarpal bone shaft	Minor flexion	FDS 950g	-1.16976	-1.21897	-0.669298		1.81719
Human #681	Parallel to the metacarpal bone shaft	Minor flexion	FDP 950g	-0.577199	-1.80443	-0.73867		2.03341
Human #681	Parallel to the metacarpal bone shaft	Minor flexion	EDC 400g	0.373105	0.0524738	-0.0181007		0.377211
Human #681	Parallel to the metacarpal bone shaft	Minor flexion	LU 45g	-0.0135866	0.151726	0.0242324		0.154248
Human #681	Parallel to the metacarpal bone shaft	Minor flexion	RI_ext 325g	-0.337812	0.178681	-0.0361459		0.383862
Human #681	Parallel to the metacarpal bone shaft	Minor flexion	RI_joint 325g	-0.196155	0.175338	0.086015		0.276801
Human #681	Parallel to the metacarpal bone shaft	Minor flexion	UI 500g	-0.916624	0.655609	-0.538093		1.24883
Human #681	Parallel to the metacarpal bone shaft	Hyperextansion	FDS 300g & FDP 300g	-0.600638	-1.69165	-0.214326		1.80787
Human #681	Parallel to the metacarpal bone shaft	Hyperextansion	FDS 950g & FDP 950g	-1.73433	-5.35099	-0.742893		5.67388
Human #681	Parallel to the metacarpal bone shaft	Hyperextansion	FDS 950g	-0.755976	-1.97125	-0.423506		2.1533
Human #681	Parallel to the metacarpal bone shaft	Hyperextansion	FDP 950g	-0.435112	-2.76414	-0.238046		2.80828
Human #681	Parallel to the metacarpal bone shaft	Hyperextansion	EDC 400g	0.520678	-0.344122	0.0340159		0.625047
Human #681	Parallel to the metacarpal bone shaft	Hyperextansion	LU 45g	0.269269	0.257558	0.130351		0.394757
Human #681	Parallel to the metacarpal bone shaft	Hyperextansion	RI_ext 325g	-0.0154526	0.213776	0.252251		0.331013
Human #681	Parallel to the metacarpal bone shaft	Hyperextansion	RI_joint 325g	0.0218837	0.188946	0.234249		0.301749
Human #681	Parallel to the metacarpal bone shaft	Hyperextansion	UI 500g	-0.111653	0.28632	-0.408256		0.510997
Human #681	Parallel to the metacarpal bone shaft	Hook	FDS 300g & FDP 300g	-0.686859	-1.21113	-0.333603		1.43175
Human #681	Parallel to the metacarpal bone shaft	Hook	FDS 950g & FDP 950g	-2.18358	-3.93278	-1.00078		4.6083
Human #681	Parallel to the metacarpal bone shaft	Hook	FDS 950g	-1.2196	-1.71289	-0.316595		2.12642
Human #681	Parallel to the metacarpal bone shaft	Hook	FDP 950g	-0.789312	-2.55412	-0.4243		2.70677
Human #681	Parallel to the metacarpal bone shaft	Hook	EDC 400g	0.346747	-0.235428	-0.00101827		0.419119
Human #681	Parallel to the metacarpal bone shaft	Hook	LU 45g	-0.00204835	0.0585707	0.0463878		0.0747432
Human #681	Parallel to the metacarpal bone shaft	Hook	RI_ext 325g	-0.348995	0.0680152	0.164726		0.391865
Human #681	Parallel to the metacarpal bone shaft	Hook	RI_joint 325g	-0.246223	-0.00585617	0.16112		0.294312
Human #681	Parallel to the metacarpal bone shaft	Hook	UI 500g	-0.439917	0.334363	-0.582802		0.803109
Ftip_PD (N)	proximal (+) / distal (-) direction of the distal phalanx
Ftip_DV (N)	dorsal (+) / volar (-) direction of the distal phalanx
Ftip_RU (N)	radial (+) / ulnar (-) direction of the distal phalanx
Ftip (N)	resultant fingertip force
